# Supplementary material for: Murine Cytomegalovirus Deubiquitinase Regulates Viral Chemokine Levels To Control Inflammation and Pathogenesis
Source: PubMed Central journal article supplement (PMC5241396; doi:10.1128/mbio.01864-16), 2017-01-17

**Figure S3**

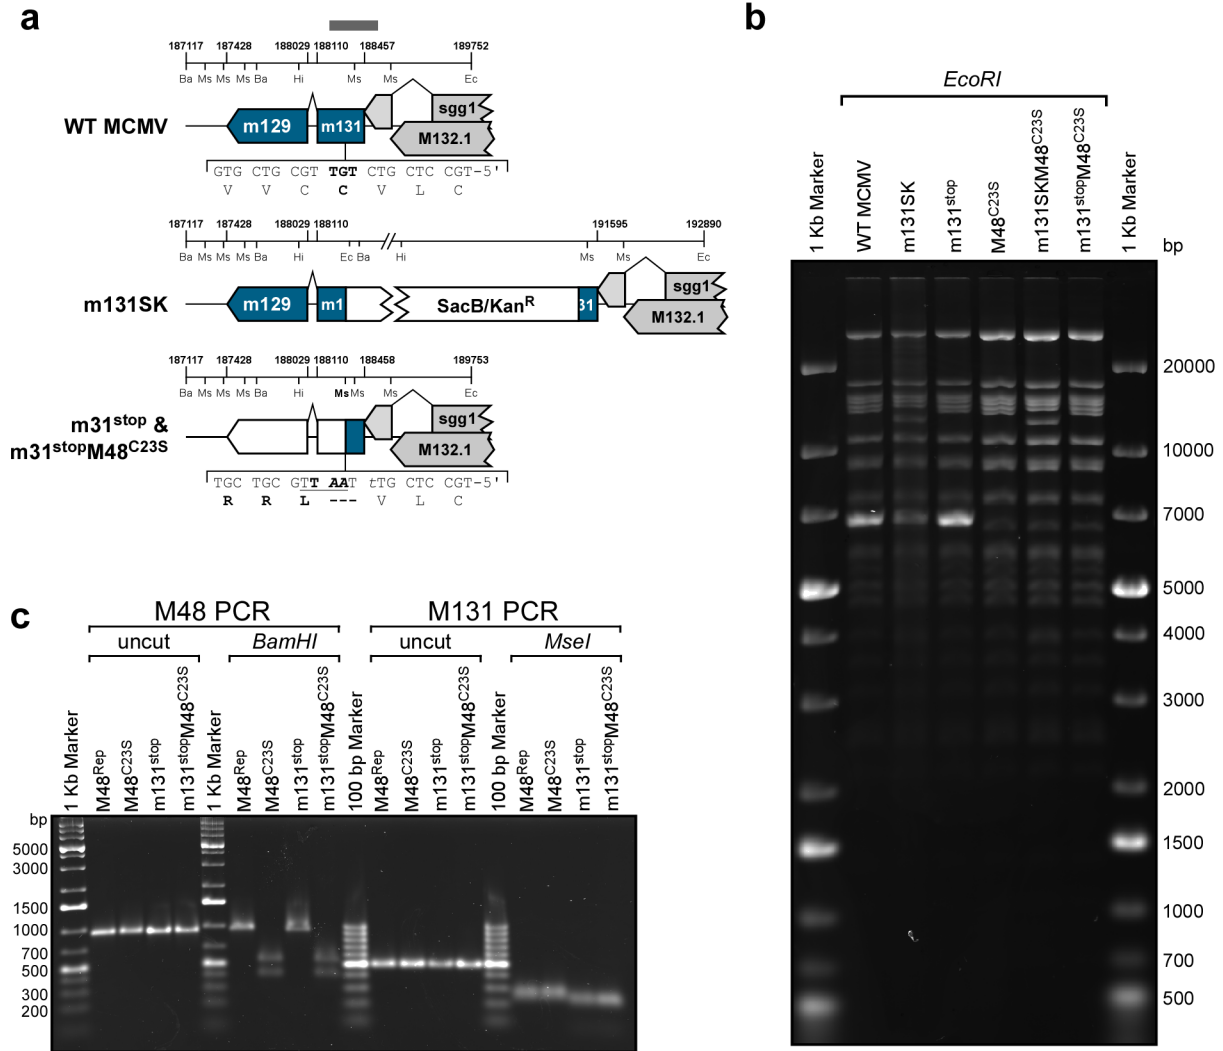

Supplement: mbo002173151sf3.pdf [file mbo002173151sf3.pdf]
