# Supplementary material for: Murine Cytomegalovirus Deubiquitinase Regulates Viral Chemokine Levels To Control Inflammation and Pathogenesis
Source: PubMed Central journal article supplement (PMC5241396; doi:10.1128/mbio.01864-16), 2017-01-17

Figure S4

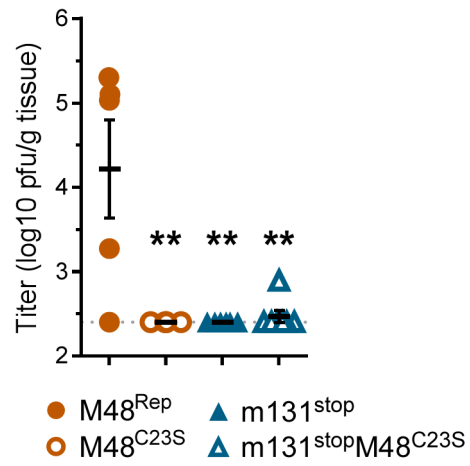

Supplement: mbo002173151sf4.pdf [file mbo002173151sf4.pdf]
